# Supplementary material for: Reducing Nitrogen Fertilization in Olive Growing by the Use of Natural Chabazite-Zeolitite as Soil Improver
Source: MDPI journal article supplement (doi:10.3390/land11091471), 2022-09-03
Supplement: s1 [file s1]

## **SUPPLEMENTARY MATERIAL 1**

### **TABLE S1**

**PAPER: Reducing Nitrogen Fertilization in Olive Growing by the Use of Natural Chabazite-Zeolitite as Soil Improver**

Authors: Valeria Medoro, Giacomo Ferretti, Giulio Galamini, Annalisa Rotondi, Lucia Morrone, Barbara Faccini and Massimo Coltorti

Journal: Land (MDPI)

Special Issue: *Soil Management for Sustainable Agriculture and Ecosystem Services*

| Treatment | Area | Type | Year | Management | pH    | st.dev | EC (mS) | st.dev | SOM   | st.dev | SOC   | st.dev | TC (%) | st.dev | TN (%) | st.dev | δ <sup>13</sup> C | st.dev | δ <sup>15</sup> N | st.dev   |
|-----------|------|------|------|------------|-------|--------|---------|--------|-------|--------|-------|--------|--------|--------|--------|--------|-------------------|--------|-------------------|----------|
| cnt       | SL   | soil | 2019 | Pre-Fert   | 8.07  | 0.46   | 0.85    | 0.14   | 4.38  | 0.55   | 2.54  | 0.32   | 2.180  | 1.280  | 0.177  | 0.074  | -20.320           | 4.125  | 6.947             | 1.933    |
| zeo       | SL   | soil | 2019 | Pre-Fert   | 8.19  | 0.29   | 0.80    | 0.12   | 4.38  | 0.61   | 2.54  | 0.35   | 1.793  | 0.101  | 0.147  | 0.055  | -16.733           | 4.546  | 4.960             | 0.653    |
| cnt       | SL   | soil | 2019 | Post-Fert  | 7.42  | 0.73   | 2.12    | 1.74   | 5.97  | 1.14   | 3.46  | 0.66   | 2.543  | 0.190  | 0.207  | 0.049  | -21.410           | 3.160  | 5.460             | 0.468    |
| zeo       | SL   | soil | 2019 | Post-Fert  | 8.19  | 0.29   | 0.80    | 0.12   | 0.12  | 0.61   | 3.12  | 0.49   | 1.710  | 0.769  | 0.217  | 0.125  | -20.017           | 3.040  | 5.673             | 0.499    |
| cnt       | SL   | soil | 2019 | Harvest    | 7.78  | 0.49   | 0.89    | 0.47   | 2.96  | 0.51   | 1.71  | 0.30   | 1.290  | 0.573  | 0.103  | 0.025  | -18.857           | 6.656  | 6.057             | 0.371    |
| zeo       | SL   | soil | 2019 | Harvest    | 8.11  | 0.36   | 0.71    | 0.14   | 2.83  | 0.67   | 1.64  | 0.39   | 1.277  | 0.457  | 0.087  | 0.025  | -15.010           | 7.553  | 4.747             | 0.176    |
| cnt       | SL   | soil | 2020 | Pre-Fert   | covid | covid  | covid   | covid  | covid | covid  | covid | covid  | covid  | covid  | covid  | covid  | covid             | covid  | covid-19          | covid-19 |
| zeo       | SL   | soil | 2020 | Pre-Fert   | covid | covid  | covid   | covid  | covid | covid  | covid | covid  | covid  | covid  | covid  | covid  | covid             | covid  | covid-19          | covid-19 |
| cnt       | SL   | soil | 2020 | Post-Fert  | 8.21  | 0.50   | 9.14    | 5.34   | 4.47  | 0.21   | 2.59  | 0.12   | 1.417  | 0.381  | 0.289  | 0.148  | -22.350           | 0.760  | 13.703            | 9.328    |
| zeo       | SL   | soil | 2020 | Post-Fert  | 8.85  | 0.13   | 7.11    | 2.22   | 4.10  | 0.69   | 2.38  | 0.40   | 1.277  | 0.212  | 0.326  | 0.032  | -22.190           | 0.389  | 17.577            | 3.932    |
| cnt       | SL   | soil | 2020 | Harvest    | 7.60  | 0.40   | 3.41    | 2.83   | 2.77  | 0.70   | 1.60  | 0.41   | 0.939  | 0.135  | 0.157  | 0.033  | -23.746           | 1.232  | 8.213             | 3.508    |
| zeo       | SL   | soil | 2020 | Harvest    | 7.26  | 0.08   | 4.31    | 0.82   | 2.63  | 0.06   | 1.53  | 0.03   | 1.014  | 0.392  | 0.180  | 0.055  | -25.887           | 1.145  | 9.417             | 4.206    |
| cnt       | SL   | soil | 2021 | Pre-Fert   | 7.94  | 0.26   | 1.03    | 0.29   | 2.80  | 0.35   | 1.62  | 0.20   | 1.297  | 0.187  | 0.147  | 0.021  | -22.871           | 0.759  | 5.358             | 0.384    |
| zeo       | SL   | soil | 2021 | Pre-Fert   | 7.67  | 0.60   | 1.19    | 0.32   | 3.70  | 0.20   | 2.15  | 0.12   | 1.362  | 0.048  | 0.175  | 0.025  | -25.008           | 3.243  | 7.311             | 1.956    |
| cnt       | SL   | soil | 2021 | Post-Fert  | 7.50  | 0.25   | 0.64    | 0.16   | 4.71  | 1.06   | 2.73  | 0.62   | 1.442  | 0.371  | 0.172  | 0.019  | -23.486           | 0.824  | 3.418             | 0.770    |
| zeo       | SL   | soil | 2021 | Post-Fert  | 7.76  | 0.99   | 0.61    | 0.13   | 5.32  | 0.36   | 3.08  | 0.21   | 1.083  | 0.202  | 0.140  | 0.007  | -22.457           | 3.358  | 2.953             | 1.083    |
| cnt       | SL   | soil | 2021 | Harvest    | 7.30  | 0.20   | 0.03    | 0.02   | 3.92  | 0.56   | 2.27  | 0.33   | 0.762  | 0.207  | 0.109  | 0.022  | -21.797           | 0.916  | -0.317            | 2.695    |
| zeo       | SL   | soil | 2021 | Harvest    | 7.29  | 0.10   | 0.05    | 0.02   | 3.60  | 0.43   | 2.09  | 0.25   | 0.847  | 0.289  | 0.117  | 0.005  | -22.567           | 1.773  | -4.020            | 4.691    |
| cnt       | BG   | soil | 2019 | Pre-Fert   | 8.91  | 0.15   | 1.11    | 0.13   | 5.53  | 0.40   | 3.20  | 0.23   | 3.495  | 0.233  | 0.095  | 0.007  | -4.265            | 0.361  | 2.895             | 0.304    |
| zeo       | BG   | soil | 2019 | Pre-Fert   | 8.72  | 0.30   | 1.04    | 0.07   | 5.90  | 0.71   | 3.42  | 0.41   | 3.610  | 0.325  | 0.120  | 0.028  | -5.915            | 1.690  | 4.225             | 1.435    |
| cnt       | BG   | soil | 2019 | Post-Fert  | 8.82  | 0.20   | 1.40    | 0.24   | 5.01  | 0.59   | 2.91  | 0.34   | 3.603  | 0.255  | 0.108  | 0.028  | -4.910            | 3.182  | 2.680             | 1.817    |
| zeo       | BG   | soil | 2019 | Post-Fert  | 8.76  | 0.15   | 1.38    | 0.29   | 5.05  | 0.66   | 2.93  | 0.38   | 3.550  | 0.290  | 0.123  | 0.014  | -5.880            | 1.930  | 2.670             | 1.994    |
| cnt       | BG   | soil | 2019 | Harvest    | 8.83  | 0.06   | 1.36    | 0.66   | 6.30  | 0.93   | 3.65  | 0.54   | 3.800  | 0.014  | 0.130  | 0.014  | -6.290            | 1.174  | 2.895             | 0.177    |
| zeo       | BG   | soil | 2019 | Harvest    | 8.89  | 0.10   | 1.14    | 0.17   | 6.30  | 0.62   | 3.65  | 0.36   | 3.720  | 0.608  | 0.125  | 0.021  | -6.130            | 1.697  | 3.290             | 2.899    |
| cnt       | BG   | soil | 2020 | Pre-Fert   | 9.08  | 0.07   | 0.85    | 0.11   | 5.53  | 0.54   | 3.20  | 0.31   | 4.000  | 0.000  | 0.139  | 0.000  | -8.260            | 0.000  | 6.040             | 0.000    |
| zeo       | BG   | soil | 2020 | Pre-Fert   | 9.01  | 0.09   | 0.90    | 0.10   | 7.33  | 0.90   | 4.25  | 0.52   | 4.820  | 0.000  | 0.172  | 0.000  | -11.760           | 0.000  | 5.450             | 0.000    |
| cnt       | BG   | soil | 2020 | Post-Fert  | 8.45  | 0.19   | 2.44    | 0.21   | 5.60  | 0.26   | 3.25  | 0.15   | 4.003  | 0.262  | 0.143  | 0.018  | -6.993            | 2.310  | 3.097             | 0.244    |
| zeo       | BG   | soil | 2020 | Post-Fert  | 8.61  | 0.32   | 1.67    | 0.59   | 6.23  | 0.45   | 3.61  | 0.26   | 3.987  | 0.309  | 0.140  | 0.029  | -7.490            | 2.327  | 1.693             | 2.681    |
| cnt       | BG   | soil | 2020 | Harvest    | 8.75  | 0.22   | 1.36    | 0.28   | 5.33  | 1.44   | 3.09  | 0.83   | 4.062  | 0.537  | 0.125  | 0.026  | -7.370            | 3.219  | 3.152             | 0.514    |
| zeo       | BG   | soil | 2020 | Harvest    | 8.70  | 0.29   | 1.36    | 0.24   | 5.87  | 1.16   | 3.40  | 0.67   | 4.158  | 0.088  | 0.148  | 0.013  | -8.524            | 0.799  | 4.471             | 1.061    |
| cnt       | BG   | soil | 2021 | Pre-Fert   | 8.51  | 0.35   | 1.20    | 0.09   | 3.23  | 1.07   | 1.88  | 0.62   | 4.702  | 0.296  | 0.164  | 0.033  | -6.729            | 1.994  | 5.190             | 0.782    |
| zeo       | BG   | soil | 2021 | Pre-Fert   | 8.59  | 0.15   | 1.20    | 0.18   | 3.30  | 0.96   | 1.91  | 0.56   | 5.193  | 0.426  | 0.188  | 0.019  | -8.340            | 1.758  | 5.413             | 0.349    |
| cnt       | BG   | soil | 2021 | Post-Fert  | 8.70  | 0.08   | 1.13    | 0.29   | 5.17  | 2.33   | 3.00  | 1.35   | 4.582  | 0.386  | 0.168  | 0.008  | -9.314            | 0.935  | 3.605             | 1.687    |
| zeo       | BG   | soil | 2021 | Post-Fert  | 8.64  | 0.25   | 1.80    | 1.06   | 4.37  | 0.70   | 2.54  | 0.40   | 3.937  | 0.212  | 0.155  | 0.025  | -7.549            | 1.516  | 3.615             | 1.817    |
| cnt       | BG   | soil | 2021 | Harvest    | 8.74  | 0.45   | 0.08    | 0.02   | 6.10  | 0.53   | 3.54  | 0.31   | 3.697  | 0.163  | 0.117  | 0.016  | -6.759            | 1.695  | 3.332             | 0.537    |
| zeo       | BG   | soil | 2021 | Harvest    | 8.95  | 0.15   | 0.07    | 0.01   | 6.30  | 1.83   | 3.65  | 1.06   | 3.727  | 0.326  | 0.146  | 0.013  | -9.058            | 1.386  | 9.577             | 3.498    |
| cnt       | BN   | soil | 2019 | Pre-Fert   | 9.69  | 0.16   | 1.21    | 0.30   | 6.42  | 0.81   | 3.72  | 0.47   | 4.393  | 1.859  | 0.227  | 0.064  | -13.160           | 3.820  | 2.660             | 0.959    |
| zeo       | BN   | soil | 2019 | Pre-Fert   | 9.73  | 0.21   | 1.23    | 0.14   | 6.53  | 0.49   | 3.79  | 0.29   | 3.780  | 1.373  | 0.197  | 0.025  | -11.400           | 2.455  | 2.207             | 0.426    |

|     |    |      |      |           |       |       |       |       |       |       |       |       |       |       |        |       |         |        |          |          |
|-----|----|------|------|-----------|-------|-------|-------|-------|-------|-------|-------|-------|-------|-------|--------|-------|---------|--------|----------|----------|
| cnt | BN | soil | 2019 | Post-Fert | 9.71  | 0.17  | 1.18  | 0.23  | 7.13  | 0.59  | 4.14  | 0.34  | 4.073 | 1.927 | 0.167  | 0.006 | -11.420 | 4.661  | 3.340    | 0.139    |
| zeo | BN | soil | 2019 | Post-Fert | 9.55  | 0.17  | 1.73  | 0.76  | 8.37  | 3.17  | 4.85  | 1.84  | 3.713 | 1.253 | 0.160  | 0.010 | -11.700 | 2.998  | 3.607    | 0.888    |
| cnt | BN | soil | 2019 | Harvest   | 9.74  | 0.20  | 1.08  | 0.12  | 6.43  | 0.81  | 3.73  | 0.47  | 4.010 | 1.589 | 0.160  | 0.000 | -10.687 | 3.972  | 12.560   | 0.404    |
| zeo | BN | soil | 2019 | Harvest   | 9.67  | 0.22  | 1.11  | 0.12  | 6.18  | 0.75  | 3.58  | 0.44  | 3.800 | 1.220 | 0.160  | 0.010 | -11.630 | 2.291  | 11.607   | 6.872    |
| cnt | BN | soil | 2020 | Pre-Fert  | covid  | covid | covid   | covid  | covid-19 | covid-19 |
| zeo | BN | soil | 2020 | Pre-Fert  | covid | covid- | covid | covid   | covid  | covid-19 | covid-19 |
| cnt | BN | soil | 2020 | Post-Fert | 8.11  | 0.14  | 0.33  | 0.18  | 7.23  | 0.70  | 4.20  | 0.41  | 4.260 | 1.895 | 0.264  | 0.086 | -15.703 | 6.685  | 3.767    | 2.205    |
| zeo | BN | soil | 2020 | Post-Fert | 7.97  | 0.28  | 0.41  | 0.05  | 7.27  | 0.64  | 4.21  | 0.37  | 3.663 | 1.660 | 0.289  | 0.061 | -14.483 | 4.186  | 2.593    | 1.635    |
| cnt | BN | soil | 2020 | Harvest   | 7.98  | 0.09  | 0.13  | 0.06  | 2.63  | 1.89  | 1.53  | 1.09  | 4.512 | 2.021 | 0.199  | 0.019 | -19.926 | 8.932  | 2.820    | 0.899    |
| zeo | BN | soil | 2020 | Harvest   | 7.98  | 0.28  | 0.27  | 0.15  | 1.00  | 1.00  | 0.58  | 0.58  | 3.771 | 1.512 | 0.207  | 0.042 | -12.833 | 4.018  | 3.734    | 2.078    |
| cnt | BN | soil | 2021 | Pre-Fert  | 7.98  | 0.09  | 0.13  | 0.06  | 6.47  | 0.95  | 3.75  | 0.55  | 4.512 | 2.021 | 0.199  | 0.019 | -19.926 | 8.932  | 2.820    | 0.899    |
| zeo | BN | soil | 2021 | Pre-Fert  | 7.98  | 0.28  | 0.27  | 0.15  | 6.07  | 0.47  | 3.52  | 0.27  | 3.771 | 1.512 | 0.207  | 0.042 | -12.833 | 4.018  | 3.734    | 2.078    |
| cnt | BN | soil | 2021 | Post-Fert | 8.13  | 0.23  | 0.37  | 0.20  | 6.53  | 0.31  | 3.79  | 0.18  | 4.572 | 1.997 | 0.246  | 0.064 | -12.707 | 5.639  | 3.085    | 3.104    |
| zeo | BN | soil | 2021 | Post-Fert | 7.83  | 0.15  | 0.74  | 0.27  | 7.29  | 0.72  | 4.23  | 0.42  | 4.438 | 1.491 | 0.351  | 0.086 | -15.543 | 3.725  | 4.696    | 3.195    |
| cnt | BN | soil | 2021 | Harvest   | 7.70  | 0.27  | 0.07  | 0.04  | 6.99  | 0.52  | 4.06  | 0.30  | 4.080 | 2.150 | 0.222  | 0.054 | -23.450 | 11.793 | 0.157    | 4.560    |
| zeo | BN | soil | 2021 | Harvest   | 7.64  | 0.21  | 0.10  | 0.05  | 7.19  | 0.80  | 4.17  | 0.46  | 3.537 | 1.656 | 0.232  | 0.070 | -21.487 | 10.293 | 2.120    | 2.530    |

| Treatment | Area | Type | Year | Management | F <sup>-</sup> | st.dev | Cl <sup>-</sup> | st.dev | N-NO <sub>2</sub> | st.dev | Br <sup>-</sup> | st.dev | N-NO <sub>3</sub> | st.dev | PO <sub>4</sub> <sup>3-</sup> | st.dev | SO <sub>4</sub> <sup>2-</sup> | st.dev |
|-----------|------|------|------|------------|----------------|--------|-----------------|--------|-------------------|--------|-----------------|--------|-------------------|--------|-------------------------------|--------|-------------------------------|--------|
| cnt       | SL   | soil | 2019 | Pre-Fert   | 6.07           | 1.39   | 14.06           | 14.98  | 0.37              | 0.09   | 0.07            | 0.15   | 17.20             | 11.69  | 11.21                         | 17.78  | 20.36                         | 6.81   |
| zeo       | SL   | soil | 2019 | Pre-Fert   | 6.13           | 1.96   | 16.16           | 8.18   | 0.39              | 0.11   | 0.00            | 0.00   | 12.61             | 8.12   | 3.55                          | 3.11   | 20.43                         | 13.27  |
| cnt       | SL   | soil | 2019 | Post-Fert  | 5.32           | 2.42   | 11.30           | 3.40   | 0.29              | 0.23   | 0.10            | 0.18   | 78.55             | 88.47  | 299.24                        | 353.71 | 108.08                        | 74.00  |
| zeo       | SL   | soil | 2019 | Post-Fert  | 4.11           | 1.09   | 10.80           | 7.74   | 0.31              | 0.27   | 0.03            | 0.09   | 47.71             | 44.04  | 271.12                        | 390.73 | 76.01                         | 91.36  |
| cnt       | SL   | soil | 2019 | Harvest    | 6.45           | 2.11   | 6.99            | 1.16   | 0.40              | 0.27   | 0.00            | 0.00   | 2.21              | 1.71   | 88.92                         | 105.58 | 76.27                         | 127.62 |
| zeo       | SL   | soil | 2019 | Harvest    | 7.22           | 2.30   | 8.59            | 3.03   | 0.26              | 0.17   | 0.00            | 0.00   | 2.57              | 2.54   | 14.43                         | 6.41   | 27.58                         | 18.60  |
| cnt       | SL   | soil | 2020 | Pre-Fert   | covid          | covid  | covid           | covid  | covid             | covid  | covid           | covid  | covid             | covid  | covid                         | covid  | covid                         | covid  |
| zeo       | SL   | soil | 2020 | Pre-Fert   | covid          | covid  | covid           | covid  | covid             | covid  | covid           | covid  | covid             | covid  | covid                         | covid  | covid                         | covid  |
| cnt       | SL   | soil | 2020 | Post-Fert  | 4.71           | 3.48   | 52.74           | 11.15  | 2.87              | 4.05   | 0.00            | 0.00   | 70.30             | 61.29  | 458.01                        | 443.15 | 1781.88                       | 982.12 |
| zeo       | SL   | soil | 2020 | Post-Fert  | 4.76           | 0.51   | 26.05           | 9.24   | 1.92              | 1.38   | 0.00            | 0.00   | 46.76             | 1.58   | 203.63                        | 98.18  | 897.00                        | 532.02 |
| cnt       | SL   | soil | 2020 | Harvest    | 2.17           | 1.07   | 22.90           | 7.37   | 2.25              | 1.55   | 0.00            | 0.00   | 205.39            | 182.09 | 10.41                         | 11.09  | 592.65                        | 456.14 |
| zeo       | SL   | soil | 2020 | Harvest    | 2.32           | 0.41   | 20.17           | 8.70   | 2.30              | 0.18   | 0.00            | 0.00   | 399.98            | 86.84  | 12.62                         | 17.41  | 102.78                        | 52.71  |
| cnt       | SL   | soil | 2021 | Pre-Fert   | 3.78           | 2.19   | 22.88           | 16.84  | 0.06              | 0.10   | 0.00            | 0.00   | 11.95             | 14.14  | 48.05                         | 38.76  | 34.62                         | 17.54  |
| zeo       | SL   | soil | 2021 | Pre-Fert   | 2.18           | 0.84   | 14.19           | 6.81   | 0.76              | 0.27   | 0.00            | 0.00   | 18.88             | 11.73  | 123.44                        | 133.33 | 99.89                         | 91.95  |
| cnt       | SL   | soil | 2021 | Post-Fert  | 3.50           | 1.12   | 15.55           | 4.51   | 1.34              | 0.10   | 0.24            | 0.42   | 19.36             | 6.45   | 49.42                         | 18.25  | 55.59                         | 33.91  |
| zeo       | SL   | soil | 2021 | Post-Fert  | 4.69           | 2.47   | 16.16           | 5.29   | 3.19              | 2.99   | 8.78            | 15.20  | 22.32             | 9.09   | 35.69                         | 35.54  | 37.00                         | 29.07  |
| cnt       | SL   | soil | 2021 | Harvest    | 4.20           | 1.29   | 22.14           | 3.57   | 0.56              | 0.60   | na              | na     | 5.10              | 1.83   | 22.46                         | 25.06  | 23.28                         | 12.40  |
| zeo       | SL   | soil | 2021 | Harvest    | 2.35           | 0.65   | 39.77           | 24.01  | 0.17              | 0.00   | na              | na     | 7.65              | 4.45   | 15.48                         | 10.11  | 17.57                         | 14.64  |
| cnt       | BG   | soil | 2019 | Pre-Fert   | 7.46           | 2.23   | 14.41           | 5.68   | 0.67              | 0.42   | 1.07            | 1.51   | 2.19              | 0.96   | 3.73                          | 3.96   | 14.14                         | 8.47   |
| zeo       | BG   | soil | 2019 | Pre-Fert   | 6.18           | 1.70   | 12.66           | 6.06   | 0.56              | 0.07   | 0.25            | 0.09   | 3.14              | 1.31   | 2.39                          | 2.07   | 12.05                         | 0.98   |
| cnt       | BG   | soil | 2019 | Post-Fert  | 6.11           | 1.78   | 44.40           | 13.97  | 0.44              | 0.40   | 1.11            | 0.03   | 14.78             | 12.47  | 4.72                          | 3.82   | 59.82                         | 27.72  |
| zeo       | BG   | soil | 2019 | Post-Fert  | 5.16           | 1.80   | 37.39           | 10.91  | 0.55              | 0.19   | 0.17            | 0.07   | 15.76             | 10.41  | 5.10                          | 5.72   | 90.58                         | 52.23  |
| cnt       | BG   | soil | 2019 | Harvest    | 7.38           | 2.55   | 35.64           | 3.40   | 0.00              | 0.00   | 0.12            | 0.06   | 3.46              | 3.30   | 0.80                          | 0.95   | 40.20                         | 22.51  |
| zeo       | BG   | soil | 2019 | Harvest    | 5.72           | 1.99   | 54.61           | 12.18  | 0.17              | 0.33   | 0.29            | 0.36   | 3.64              | 3.06   | 1.11                          | 2.22   | 61.32                         | 30.30  |
| cnt       | BG   | soil | 2020 | Pre-Fert   | na             | na     | na              | na     | na                | na     | na              | na     | na                | na     | na                            | na     | na                            | na     |
| zeo       | BG   | soil | 2020 | Pre-Fert   | na             | na     | na              | na     | na                | na     | na              | na     | na                | na     | na                            | na     | na                            | na     |
| cnt       | BG   | soil | 2020 | Post-Fert  | 3.06           | 0.88   | 20.96           | 4.11   | 0.23              | 0.39   | 0.00            | 0.00   | 105.00            | 22.48  | 0.10                          | 0.17   | 34.70                         | 9.68   |
| zeo       | BG   | soil | 2020 | Post-Fert  | 4.79           | 0.74   | 24.00           | 11.09  | 1.85              | 3.20   | 0.00            | 0.00   | 38.62             | 40.92  | 0.00                          | 0.00   | 27.01                         | 2.22   |
| cnt       | BG   | soil | 2020 | Harvest    | 4.61           | 0.98   | 33.28           | 4.73   | 0.43              | 0.05   | 0.00            | 0.00   | 20.32             | 9.73   | 1.90                          | 1.95   | 35.09                         | 16.21  |
| zeo       | BG   | soil | 2020 | Harvest    | 3.97           | 0.72   | 27.57           | 11.98  | 0.00              | 0.00   | 0.00            | 0.00   | 42.35             | 34.39  | 2.40                          | 4.16   | 24.31                         | 10.85  |

|     |    |      |      |           |       |       |       |       |       |       |       |       |        |        |       |       |       |       |
|-----|----|------|------|-----------|-------|-------|-------|-------|-------|-------|-------|-------|--------|--------|-------|-------|-------|-------|
| cnt | BG | soil | 2021 | Pre-Fert  | 6.14  | 3.02  | 34.92 | 2.31  | 0.46  | 0.41  | 0.00  | 0.00  | 11.16  | 8.56   | 2.21  | 2.00  | 14.28 | 10.21 |
| zeo | BG | soil | 2021 | Pre-Fert  | 4.96  | 0.97  | 18.79 | 10.69 | 0.00  | 0.00  | 0.00  | 0.00  | 7.68   | 4.81   | 5.58  | 1.49  | 14.43 | 4.71  |
| cnt | BG | soil | 2021 | Post-Fert | 4.29  | 1.13  | 18.91 | 4.64  | 2.15  | 0.76  | 0.00  | 0.00  | 24.95  | 15.38  | 2.74  | 3.16  | 50.44 | 36.09 |
| zeo | BG | soil | 2021 | Post-Fert | 4.67  | 1.43  | 21.82 | 3.84  | 2.62  | 1.59  | 0.00  | 0.00  | 102.34 | 88.46  | 0.00  | 0.00  | 43.24 | 34.68 |
| cnt | BG | soil | 2021 | Harvest   | 2.39  | 1.01  | 54.90 | 38.21 | 0.00  | 0.00  | 0.14  | 0.00  | 4.91   | 4.05   | 5.67  | 0.00  | 19.49 | 5.73  |
| zeo | BG | soil | 2021 | Harvest   | 3.04  | 0.81  | 51.08 | 44.57 | 0.30  | 0.00  | 0.00  | 0.00  | 12.08  | 7.96   | 6.17  | 5.01  | 27.32 | 7.92  |
| cnt | BN | soil | 2019 | Pre-Fert  | 6.67  | 1.27  | 15.45 | 12.84 | 1.26  | 0.99  | 0.00  | 0.00  | 6.64   | 6.23   | 0.08  | 0.12  | 5.17  | 2.76  |
| zeo | BN | soil | 2019 | Pre-Fert  | 6.43  | 1.15  | 12.70 | 6.55  | 0.76  | 0.31  | 0.00  | 0.00  | 8.41   | 7.57   | 0.05  | 0.07  | 3.86  | 0.67  |
| cnt | BN | soil | 2019 | Post-Fert | 5.69  | 1.39  | 9.78  | 4.53  | 0.42  | 0.14  | 0.00  | 0.00  | 29.07  | 22.05  | 0.03  | 0.10  | 3.34  | 1.15  |
| zeo | BN | soil | 2019 | Post-Fert | 5.81  | 1.49  | 13.43 | 7.53  | 0.51  | 0.21  | 0.00  | 0.00  | 57.82  | 69.69  | 0.05  | 0.09  | 3.49  | 1.65  |
| cnt | BN | soil | 2019 | Harvest   | 7.57  | 1.59  | 13.78 | 4.74  | 0.84  | 0.43  | 0.03  | 0.10  | 3.04   | 1.88   | 0.00  | 0.00  | 4.24  | 1.27  |
| zeo | BN | soil | 2019 | Harvest   | 7.40  | 1.29  | 15.81 | 7.71  | 0.51  | 0.52  | 0.04  | 0.08  | 2.28   | 1.31   | 0.07  | 0.14  | 3.21  | 0.75  |
| cnt | BN | soil | 2020 | Pre-Fert  | covid  | covid  | covid | covid | covid | covid |
| zeo | BN | soil | 2020 | Pre-Fert  | covid  | covid  | covid | covid | covid | covid |
| cnt | BN | soil | 2020 | Post-Fert | 0.31  | 0.10  | 30.92 | 41.88 | 0.25  | 0.31  | 0.00  | 0.00  | 22.60  | 15.96  | 0.00  | 0.00  | 4.79  | 3.21  |
| zeo | BN | soil | 2020 | Post-Fert | 0.33  | 0.12  | 5.34  | 2.93  | 0.22  | 0.10  | 0.00  | 0.00  | 29.50  | 5.43   | 0.00  | 0.00  | 4.88  | 2.02  |
| cnt | BN | soil | 2020 | Harvest   | 3.62  | 0.38  | 40.85 | 22.76 | 0.82  | 0.33  | 0.00  | 0.00  | 54.80  | 61.89  | 0.09  | 0.15  | 11.06 | 8.10  |
| zeo | BN | soil | 2020 | Harvest   | 3.29  | 0.35  | 21.75 | 10.96 | 5.69  | 5.86  | 0.00  | 0.00  | 199.86 | 139.03 | 0.09  | 0.16  | 19.61 | 10.17 |
| cnt | BN | soil | 2021 | Pre-Fert  | 3.62  | 0.38  | 40.85 | 22.76 | 0.82  | 0.33  | 0.00  | 0.00  | 54.80  | 61.89  | 0.09  | 0.15  | 11.06 | 8.10  |
| zeo | BN | soil | 2021 | Pre-Fert  | 3.29  | 0.35  | 21.75 | 10.96 | 5.69  | 5.86  | 0.00  | 0.00  | 199.86 | 139.03 | 0.09  | 0.16  | 19.61 | 10.17 |
| cnt | BN | soil | 2021 | Post-Fert | 4.78  | 1.15  | 32.73 | 13.16 | 6.44  | 4.72  | 0.00  | 0.00  | 413.59 | 260.51 | 0.00  | 0.00  | 21.05 | 19.29 |
| zeo | BN | soil | 2021 | Post-Fert | 4.21  | 0.84  | 46.33 | 16.91 | 12.41 | 5.33  | 0.00  | 0.00  | 975.43 | 456.03 | 0.00  | 0.00  | 49.05 | 42.54 |
| cnt | BN | soil | 2021 | Harvest   | 3.10  | 0.85  | 18.87 | 0.91  | 0.22  | 0.04  | 0.00  | 0.00  | 31.83  | 24.17  | 0.00  | 0.00  | 9.72  | 7.21  |
| zeo | BN | soil | 2021 | Harvest   | 2.84  | 0.74  | 33.42 | 24.93 | 16.24 | 27.88 | 0.00  | 0.00  | 44.69  | 31.58  | 0.32  | 0.31  | 7.42  | 1.55  |

| Treatment | Area | Type | Year | Management_status | TC (%) | dev.std<br>TC | TN (%) | dev.std<br>TN | $\delta^{13}\text{C}$ | dev.std<br>$\delta^{13}\text{C}$ | $\delta^{15}\text{N}$ | dev.std<br>$\delta^{15}\text{N}$ |
|-----------|------|------|------|-------------------|--------|---------------|--------|---------------|-----------------------|----------------------------------|-----------------------|----------------------------------|
| cnt       | SL   | leaf | 2019 | Pre-Fert          | 44.951 | 1.322         | 2.069  | 0.189         | -26.822               | 1.852                            | 2.164                 | 0.757                            |
| zeo       | SL   | leaf | 2019 | Pre-Fert          | 46.353 | 0.384         | 2.020  | 0.230         | -25.966               | 0.431                            | 1.795                 | 1.429                            |
| cnt       | SL   | leaf | 2019 | Post-Fert         | 49.979 | 3.420         | 1.968  | 0.218         | -25.243               | 0.458                            | 3.629                 | 0.607                            |
| zeo       | SL   | leaf | 2019 | Post-Fert         | 46.048 | 1.535         | 1.778  | 0.036         | -24.905               | 0.634                            | 2.631                 | 1.419                            |
| cnt       | SL   | leaf | 2019 | Harvest           | 46.427 | 2.959         | 1.665  | 0.290         | -25.503               | 0.558                            | 4.088                 | 0.563                            |
| zeo       | SL   | leaf | 2019 | Harvest           | 51.354 | 3.069         | 1.833  | 0.145         | -25.608               | 0.419                            | 2.537                 | 1.086                            |
| cnt       | SL   | leaf | 2020 | Pre-Fert          | covid  | covid         | covid  | covid         | covi                  | covid                            | covid                 | covid                            |
| zeo       | SL   | leaf | 2020 | Pre-Fert          | covid  | covid         | covid  | covid         | covid                 | covid                            | covid                 | covid                            |
| cnt       | SL   | leaf | 2020 | Post-Fert         | 46.673 | 4.178         | 1.672  | 0.228         | -26.053               | 0.724                            | 2.770                 | 1.700                            |
| zeo       | SL   | leaf | 2020 | Post-Fert         | 46.350 | 2.138         | 1.739  | 0.198         | -24.423               | 0.918                            | 1.787                 | 1.272                            |
| cnt       | SL   | leaf | 2020 | Harvest           | 47.580 | 0.574         | 1.407  | 0.327         | -24.390               | 2.144                            | 0.723                 | 4.517                            |
| zeo       | SL   | leaf | 2020 | Harvest           | 47.320 | 2.696         | 1.927  | 0.194         | -28.320               | 6.699                            | 0.563                 | 4.027                            |
| cnt       | SL   | leaf | 2021 | Pre-Fert          | 44.523 | 2.572         | 1.845  | 0.332         | -25.170               | 0.667                            | 1.857                 | 1.287                            |
| zeo       | SL   | leaf | 2021 | Pre-Fert          | 44.027 | 3.639         | 2.002  | 0.161         | -25.153               | 0.451                            | 2.643                 | 0.093                            |
| cnt       | SL   | leaf | 2021 | Post-Fert         | 37.440 | 8.073         | 1.487  | 0.239         | -23.797               | 0.423                            | 0.683                 | 1.946                            |
| zeo       | SL   | leaf | 2021 | Post-Fert         | 35.660 | 4.966         | 1.453  | 0.125         | -24.010               | 0.199                            | 2.083                 | 0.692                            |
| cnt       | SL   | leaf | 2021 | Harvest           | 57.773 | 14.392        | 2.215  | 0.562         | -57.867               | 1.904                            | 2.217                 | 2.276                            |
| zeo       | SL   | leaf | 2021 | Harvest           | 47.517 | 3.843         | 1.872  | 0.170         | -49.247               | 6.866                            | -0.313                | 3.204                            |
| cnt       | BG   | leaf | 2019 | Pre-Fert          | 46.909 | 2.163         | 1.960  | 0.421         | -24.922               | 0.237                            | 2.645                 | 0.893                            |
| zeo       | BG   | leaf | 2019 | Pre-Fert          | 45.808 | 0.766         | 1.709  | 0.146         | -24.763               | 0.571                            | 3.452                 | 1.264                            |
| cnt       | BG   | leaf | 2019 | Post-Fert         | 42.201 | 8.359         | 1.059  | 0.225         | -24.498               | 0.243                            | 1.506                 | 0.384                            |
| zeo       | BG   | leaf | 2019 | Post-Fert         | 46.861 | 0.521         | 1.160  | 0.105         | -24.323               | 0.134                            | 2.452                 | 0.898                            |
| cnt       | BG   | leaf | 2019 | Harvest           | 57.960 | 7.439         | 1.395  | 0.403         | -26.670               | 3.380                            | 1.060                 | 0.028                            |
| zeo       | BG   | leaf | 2019 | Harvest           | 49.652 | 1.384         | 1.249  | 0.148         | -33.567               | 15.090                           | 1.185                 | 0.807                            |
| cnt       | BG   | leaf | 2020 | Pre-Fert          | 44.525 | 1.294         | 0.982  | 0.095         | -24.380               | 0.297                            | 0.795                 | 1.110                            |
| zeo       | BG   | leaf | 2020 | Pre-Fert          | 43.985 | 4.476         | 0.945  | 0.018         | -24.635               | 0.304                            | 1.065                 | 1.817                            |
| cnt       | BG   | leaf | 2020 | Post-Fert         | 48.120 | 1.218         | 0.794  | 0.058         | -25.527               | 2.324                            | -0.303                | 0.692                            |
| zeo       | BG   | leaf | 2020 | Post-Fert         | 42.583 | 16.094        | -0.151 | 1.814         | -24.943               | 1.262                            | 0.650                 | 0.996                            |
| cnt       | BG   | leaf | 2020 | Harvest           | 40.363 | 0.627         | 1.105  | 0.060         | -27.173               | 2.032                            | 1.360                 | 2.512                            |

|     |    |      |      |           |        |        |       |       |         |        |        |       |
|-----|----|------|------|-----------|--------|--------|-------|-------|---------|--------|--------|-------|
| zeo | BG | leaf | 2020 | Harvest   | 44.980 | 5.983  | 1.263 | 0.175 | -32.517 | 13.963 | 0.523  | 1.900 |
| cnt | BG | leaf | 2021 | Pre-Fert  | 43.330 | 5.012  | 1.280 | 0.203 | -24.670 | 0.319  | 1.505  | 0.726 |
| zeo | BG | leaf | 2021 | Pre-Fert  | 44.215 | 4.593  | 1.412 | 0.416 | -24.723 | 0.393  | 0.565  | 1.013 |
| cnt | BG | leaf | 2021 | Post-Fert | 46.297 | 7.252  | 1.474 | 0.364 | -24.023 | 0.352  | -2.117 | 1.930 |
| zeo | BG | leaf | 2021 | Post-Fert | 50.340 | 4.946  | 1.600 | 0.303 | -24.183 | 0.060  | -0.623 | 0.822 |
| cnt | BG | leaf | 2021 | Harvest   | 52.327 | 2.120  | 1.690 | 0.272 | -35.057 | 14.939 | -0.107 | 1.804 |
| zeo | BG | leaf | 2021 | Harvest   | 61.913 | 7.955  | 2.029 | 0.498 | -36.667 | 22.806 | -0.350 | 0.984 |
| cnt | BN | leaf | 2019 | Pre-Fert  | 44.740 | 2.019  | 2.169 | 0.256 | -25.918 | 0.425  | 0.340  | 1.462 |
| zeo | BN | leaf | 2019 | Pre-Fert  | 45.166 | 1.019  | 2.267 | 0.262 | -26.086 | 0.391  | 0.009  | 1.822 |
| cnt | BN | leaf | 2019 | Post-Fert | 44.855 | 1.274  | 1.794 | 0.045 | -25.401 | 0.406  | -1.932 | 0.627 |
| zeo | BN | leaf | 2019 | Post-Fert | 46.023 | 0.544  | 1.926 | 0.088 | -26.487 | 0.579  | -1.769 | 0.644 |
| cnt | BN | leaf | 2019 | Harvest   | 48.140 | 4.739  | 2.081 | 0.125 | -36.776 | 19.224 | 0.177  | 1.318 |
| zeo | BN | leaf | 2019 | Harvest   | 51.932 | 7.873  | 2.289 | 0.295 | -28.944 | 3.285  | 1.494  | 1.386 |
| cnt | BN | leaf | 2020 | Pre-Fert  | covid  | covid  | covid | covid | covid   | covid- | covid  | covid |
| zeo | BN | leaf | 2020 | Pre-Fert  | covid  | covid  | covid | covid | covid   | covid  | covid  | covid |
| cnt | BN | leaf | 2020 | Post-Fert | 53.300 | 4.775  | 1.739 | 0.201 | -29.220 | 7.838  | -1.667 | 1.358 |
| zeo | BN | leaf | 2020 | Post-Fert | 47.937 | 2.336  | 1.721 | 0.150 | -25.370 | 0.661  | -1.627 | 0.248 |
| cnt | BN | leaf | 2020 | Harvest   | 47.993 | 0.842  | 1.817 | 0.300 | -24.560 | 0.439  | -1.553 | 0.903 |
| zeo | BN | leaf | 2020 | Harvest   | 49.257 | 2.115  | 2.025 | 0.269 | -25.657 | 1.831  | -0.790 | 1.502 |
| cnt | BN | leaf | 2021 | Pre-Fert  | 47.993 | 0.842  | 1.817 | 0.300 | -24.560 | 0.439  | -1.553 | 0.903 |
| zeo | BN | leaf | 2021 | Pre-Fert  | 49.257 | 2.115  | 2.025 | 0.269 | -25.657 | 1.831  | -0.790 | 1.502 |
| cnt | BN | leaf | 2021 | Post-Fert | 50.277 | 6.019  | 2.122 | 0.459 | -23.813 | 0.520  | -0.317 | 0.345 |
| zeo | BN | leaf | 2021 | Post-Fert | 48.227 | 13.246 | 1.910 | 0.493 | -24.320 | 0.707  | -2.377 | 1.756 |
| cnt | BN | leaf | 2021 | Harvest   | 48.630 | 4.241  | 1.927 | 0.043 | -33.620 | 14.441 | -1.130 | 2.082 |
| zeo | BN | leaf | 2021 | Harvest   | 50.920 | 5.931  | 1.996 | 0.383 | -45.230 | 19.645 | -0.990 | 1.428 |
